# Supplementary material for: Genetic diversity and population structure analysis of the endangered endemic and economically important plant, Red Sanders, distributed in the Eastern Ghats. India
Source: Research Square preprint supplement (doi:10.21203/rs.3.rs-7357158/v1), 2025-09-05
Supplement: Supplementary file 1 [file 7e08eeee98fceffca01652cb.docx]

**Supplementary File**

**Supplementary Fig 1:Number of rare and unique alleles from 16 loci of *Pterocarpus santalinus***

**Supplementary Fig 2 a. Genetic diversity analysis of *Pterocarpus santalinus*across the different altitude groups in the Eastern Ghats, Andhra Pradesh. b. Map showing populations under three latitude groups, L1(14.5 to 15.3 °N), L2(14.0 to 14.5 °N), and L3(13.0 to 13.9°N).Ne: number of effective alleles, I: Shannon's Information Index, Ho: observed heterozygosity, He: expected heterozygosity, F: fixation index, Pa: number of private alleles.**


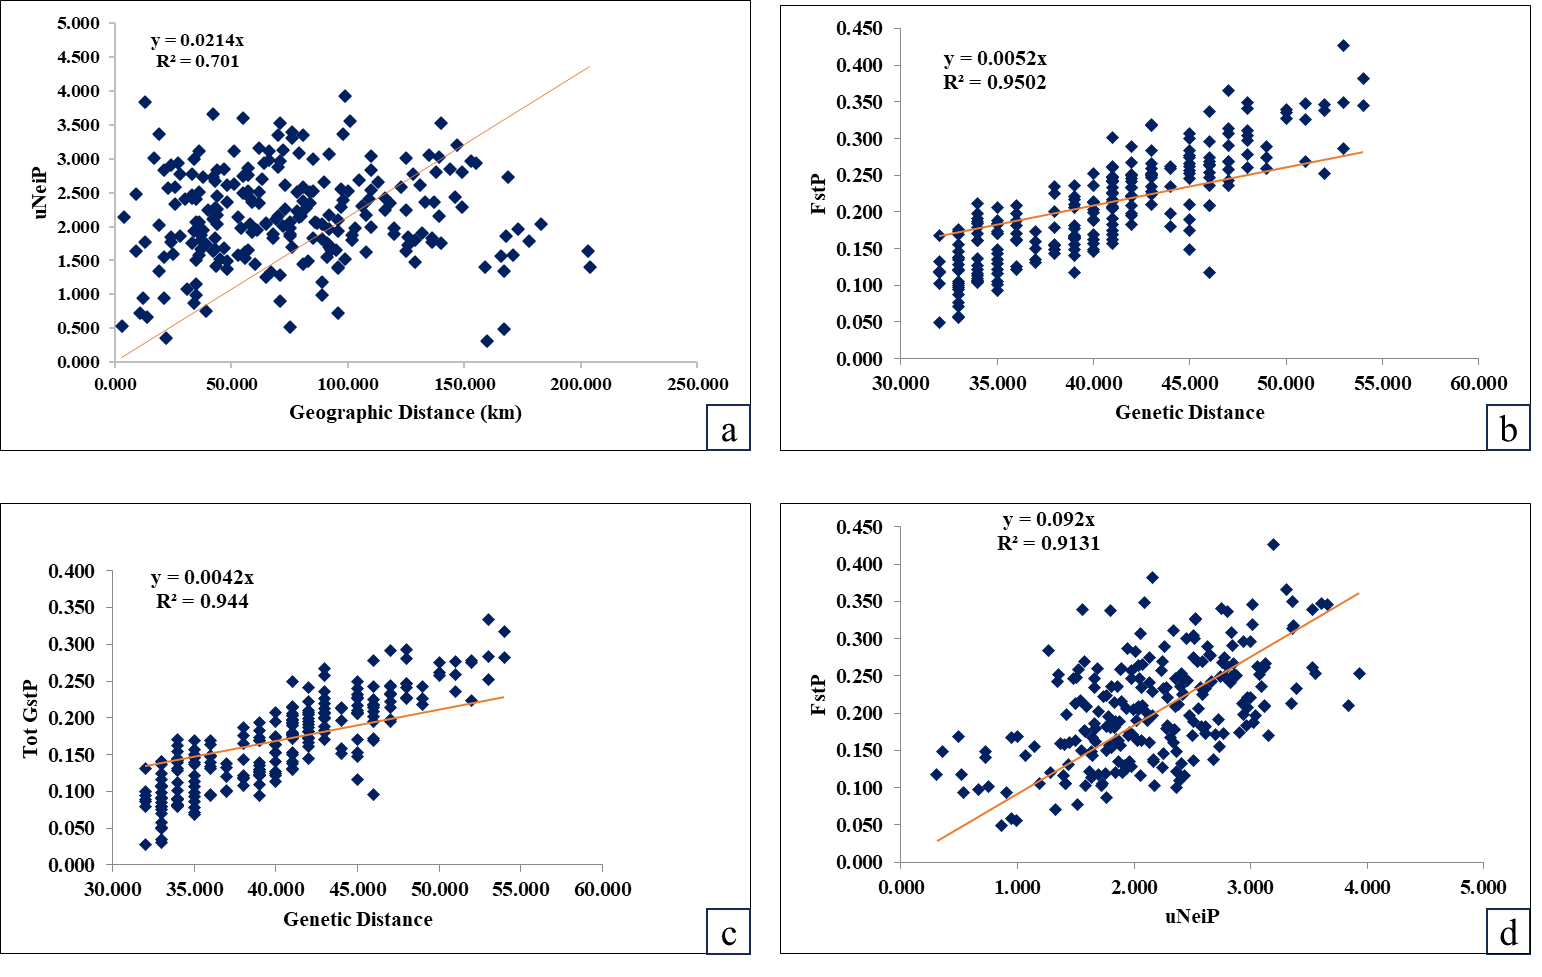


**Supplementary Fig 3: Mantel test for a relationship between a. Pairwise population matrix of Nei’s unbiased genetic distance and geographic distance. b. Pairwise FSTand genetic distance. c. GST matrix and genetic distance. d.** **Pairwise FST and Pairwise population matrix of Nei’s unbiased genetic distance.**

**Supplementary Fig 4: Major environmental factors over three decades (1981 to 2022) inthe distribution range of *Pterocarpus santalinus* populations in Eastern Ghats, Andhra Pradesh, India. a. Temperature, b. Relative humidity, c. Wind direction, d. Precipitation of all data presented in annual mean with standard deviation.**


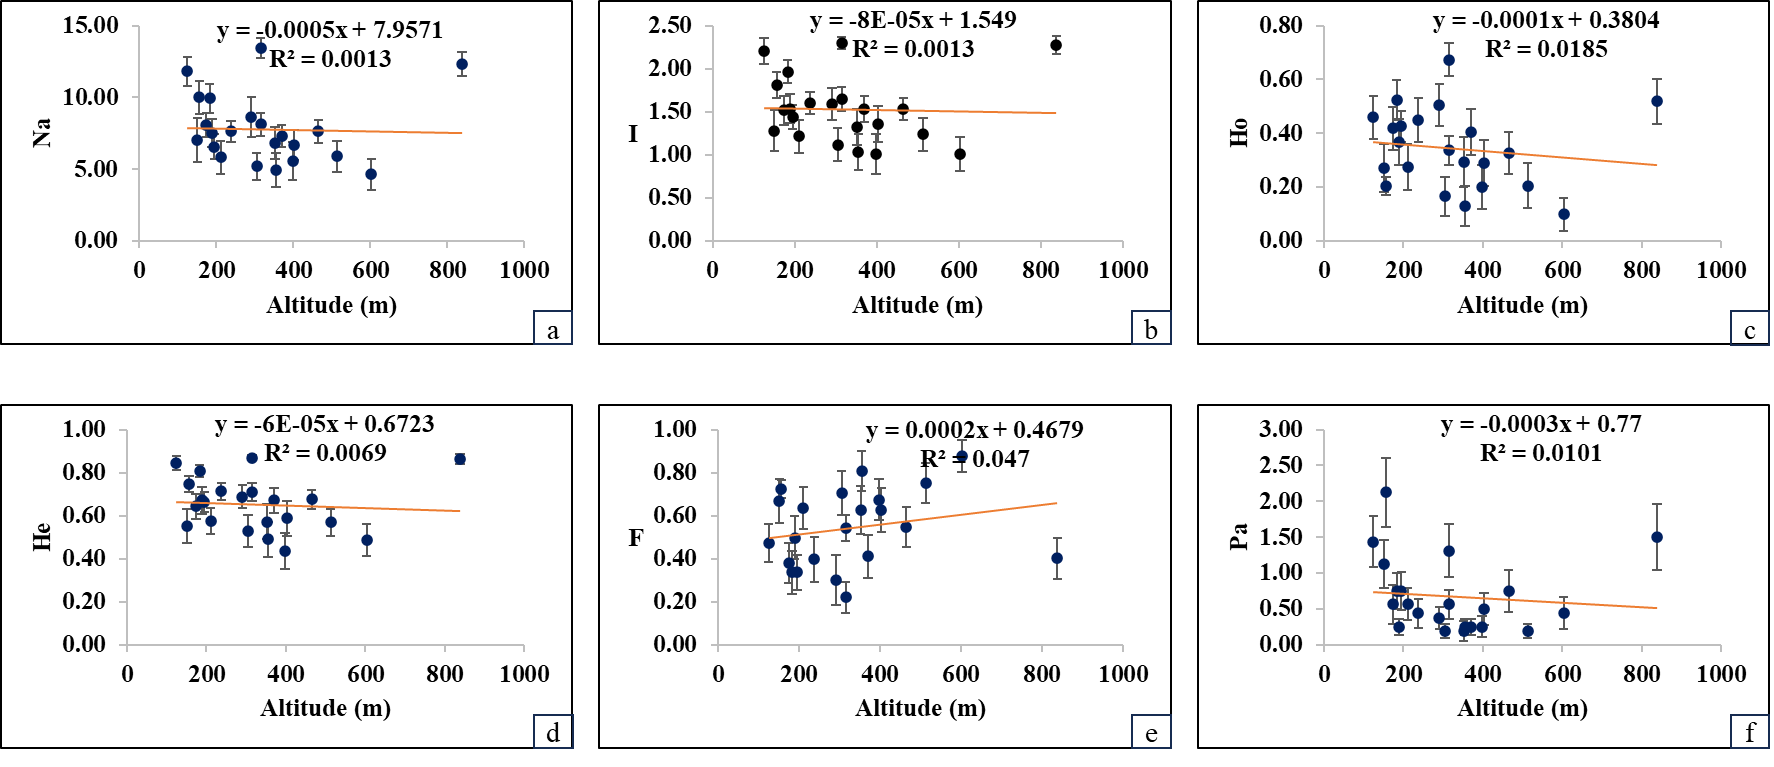


**Supplementary Fig 5: Altitude with Genetic diversity indices (a to f) of *Pterocarpus santalinus* populations in Eastern Ghats,Andhra Pradesh, India. No significant relationship was found between them. Na: number of alleles, Ho: observed heterozygosity, He: expected heterozygosity, I: Shannon's Information Index, F: fixation index, Pa: number of private alleles.**

**Supplementary Fig 6: Latitude with Genetic diversity indices (a to f) of *Pterocarpus santalinus* populations in Eastern Ghats, Andhra Pradesh, India. Na: number of alleles, Ho: observed heterozygosity, He: expected heterozygosity, I: Shannon's Information Index, F: fixation index, Pa: number of private alleles.**

**Supplementary Fig 7: Mean Annual Temperature with Genetic Diversity Indices of *Pterocarpus santalinus* populations in Eastern Ghats,Andhra Pradesh, India. No significant relationship was found between the genetic parameters. Na: number of alleles, Ho: observed heterozygosity, He: expected heterozygosity, I: Shannon's Information Index, F: fixation index, Pa: number of private alleles.**

**Supplementary Fig 8: Mean Relative Humidity with Genetic Diversity Indices of *Pterocarpus santalinus* populations in Eastern Ghats, Andhra Pradesh, India. No significant relationship was found between the genetic parameters.. Na: number of alleles, Ho: observed heterozygosity, He: expected heterozygosity, I: Shannon's Information Index, F: fixation index, Pa: number of private alleles.**

**Supplementary Fig 9: Mean Annual Precipitation with Genetic diversity indices of *Pterocarpus santalinus* populations in Eastern Ghats, Andhra Pradesh, India. A positive and significant relationship was found between genetic parameters. Na: number of alleles, Ho: observed heterozygosity, He: expected heterozygosity, I: Shannon's Information Index, F: fixation index, Pa: number of private alleles.**

**Supplementary Fig 10: Mean Annual Precipitation with Genetic diversity indices for three latitude groups of *Pterocarpus santalinus* populations in Eastern Ghats, Andhra Pradesh, India. A positive and trend of significant relationship was found between the genetic parameters. Na: number of alleles, Ho: observed heterozygosity, He: expected heterozygosity, I: Shannon's Information Index, F: fixation index, Pa: number of private alleles.**

b

a

**Supplementary Fig 11**: **a.Genetic diversity analysis of *Pterocarpus santalinus* across thethree Circles of forest classification based on Andhra Pradesh Forest Department. b. Map showing populations under three different forest circles in the Eastern Ghats, Andhra Pradesh, India. Na: number of alleles, Ne: number of effective alleles, I: Shannon's Information Index, Ho: observed heterozygosity, He: expected heterozygosity, F: fixation index, Pa: number of private alleles.**

b

a

**Supplementary Fig 12. a.Genetic diversity analysis of *Pterocarpus santalinus* across theDivision-Wise Forest classification based on Andhra Pradesh Forest Department. b. Mapshowcases the population distribution across various forest divisions in the Eastern Ghats region of Andhra Pradesh, India.**

**CTR-Chitoor; NLR-Nellore; GDR-Giddaluru; KDP-Kadapa; NDL- Nandyal; PDT-Podratur; RJT-Rajampet; TPT-Tirupati. N: mean number of samples, Na: number of alleles, Ne: number of effective alleles, I: Shannon's Information Index, Ho: observed heterozygosity, He: expected heterozygosity, F: fixation index, Pa: number of private alleles.**
